# Supplementary material
Source: MDPI journal article supplement (https://www.mdpi.com/2673-9992/14/1/116)
Supplement: s1 [file s1 › msf-2177016-supplementary.pdf]

# CHALCONES AS POTENTIAL INHIBITORS OF PANCREATIC LIPASE

Sílvia Rocha<sup>1</sup>, Álvaro Tomé<sup>1, 2</sup>, Ana Teresa Rufino<sup>1</sup>, Marisa Freitas<sup>1</sup>, Félix Carvalho<sup>3</sup>, Artur Silva<sup>4</sup>, Eduarda Fernandes<sup>1</sup>

<sup>1</sup> LAQV, REQUIMTE, Laboratory of Applied Chemistry, Department of Chemical Sciences, Faculty of Pharmacy, University of Porto, Portugal

<sup>1,2</sup> CISQ, Department of Chemistry, Faculty of science and technology, University of La Rioja, Spain

<sup>3</sup> UCIBIO, REQUIMTE, Laboratory of Toxicology, Department of Biological Sciences, Faculty of Pharmacy, University of Porto, Portugal

<sup>4</sup> LAQV, REQUIMTE, Department of Chemistry, University of Aveiro, Portugal

## INTRODUCTION

Obesity is a global disease that has been escalating to epidemic proportions over the past years. A recent report from World Obesity Federation predicts that, in 2030, 1 billion people will be obese<sup>1</sup>. Thus, it is mandatory to develop new therapeutic options that are able to manage and control obesity. One of the most promising research paths is the inhibition of pancreatic lipase (PL), responsible for the hydrolysis of 50 to 70% of total dietary triglycerides (Figure 1)<sup>2</sup>.

Polyphenols are natural occurring and structurally diverse compounds with different biological activities, such as anti-inflammatory, antioxidant, antidiabetic, and anti-obesity activities<sup>3</sup>. Chalcones are the precursors of flavonoids, consisting of two benzene rings connected by a three-carbon  $\alpha,\beta$ -unsaturated carbonyl structure, that have been explored as potential anti-obesity molecules<sup>4</sup>.

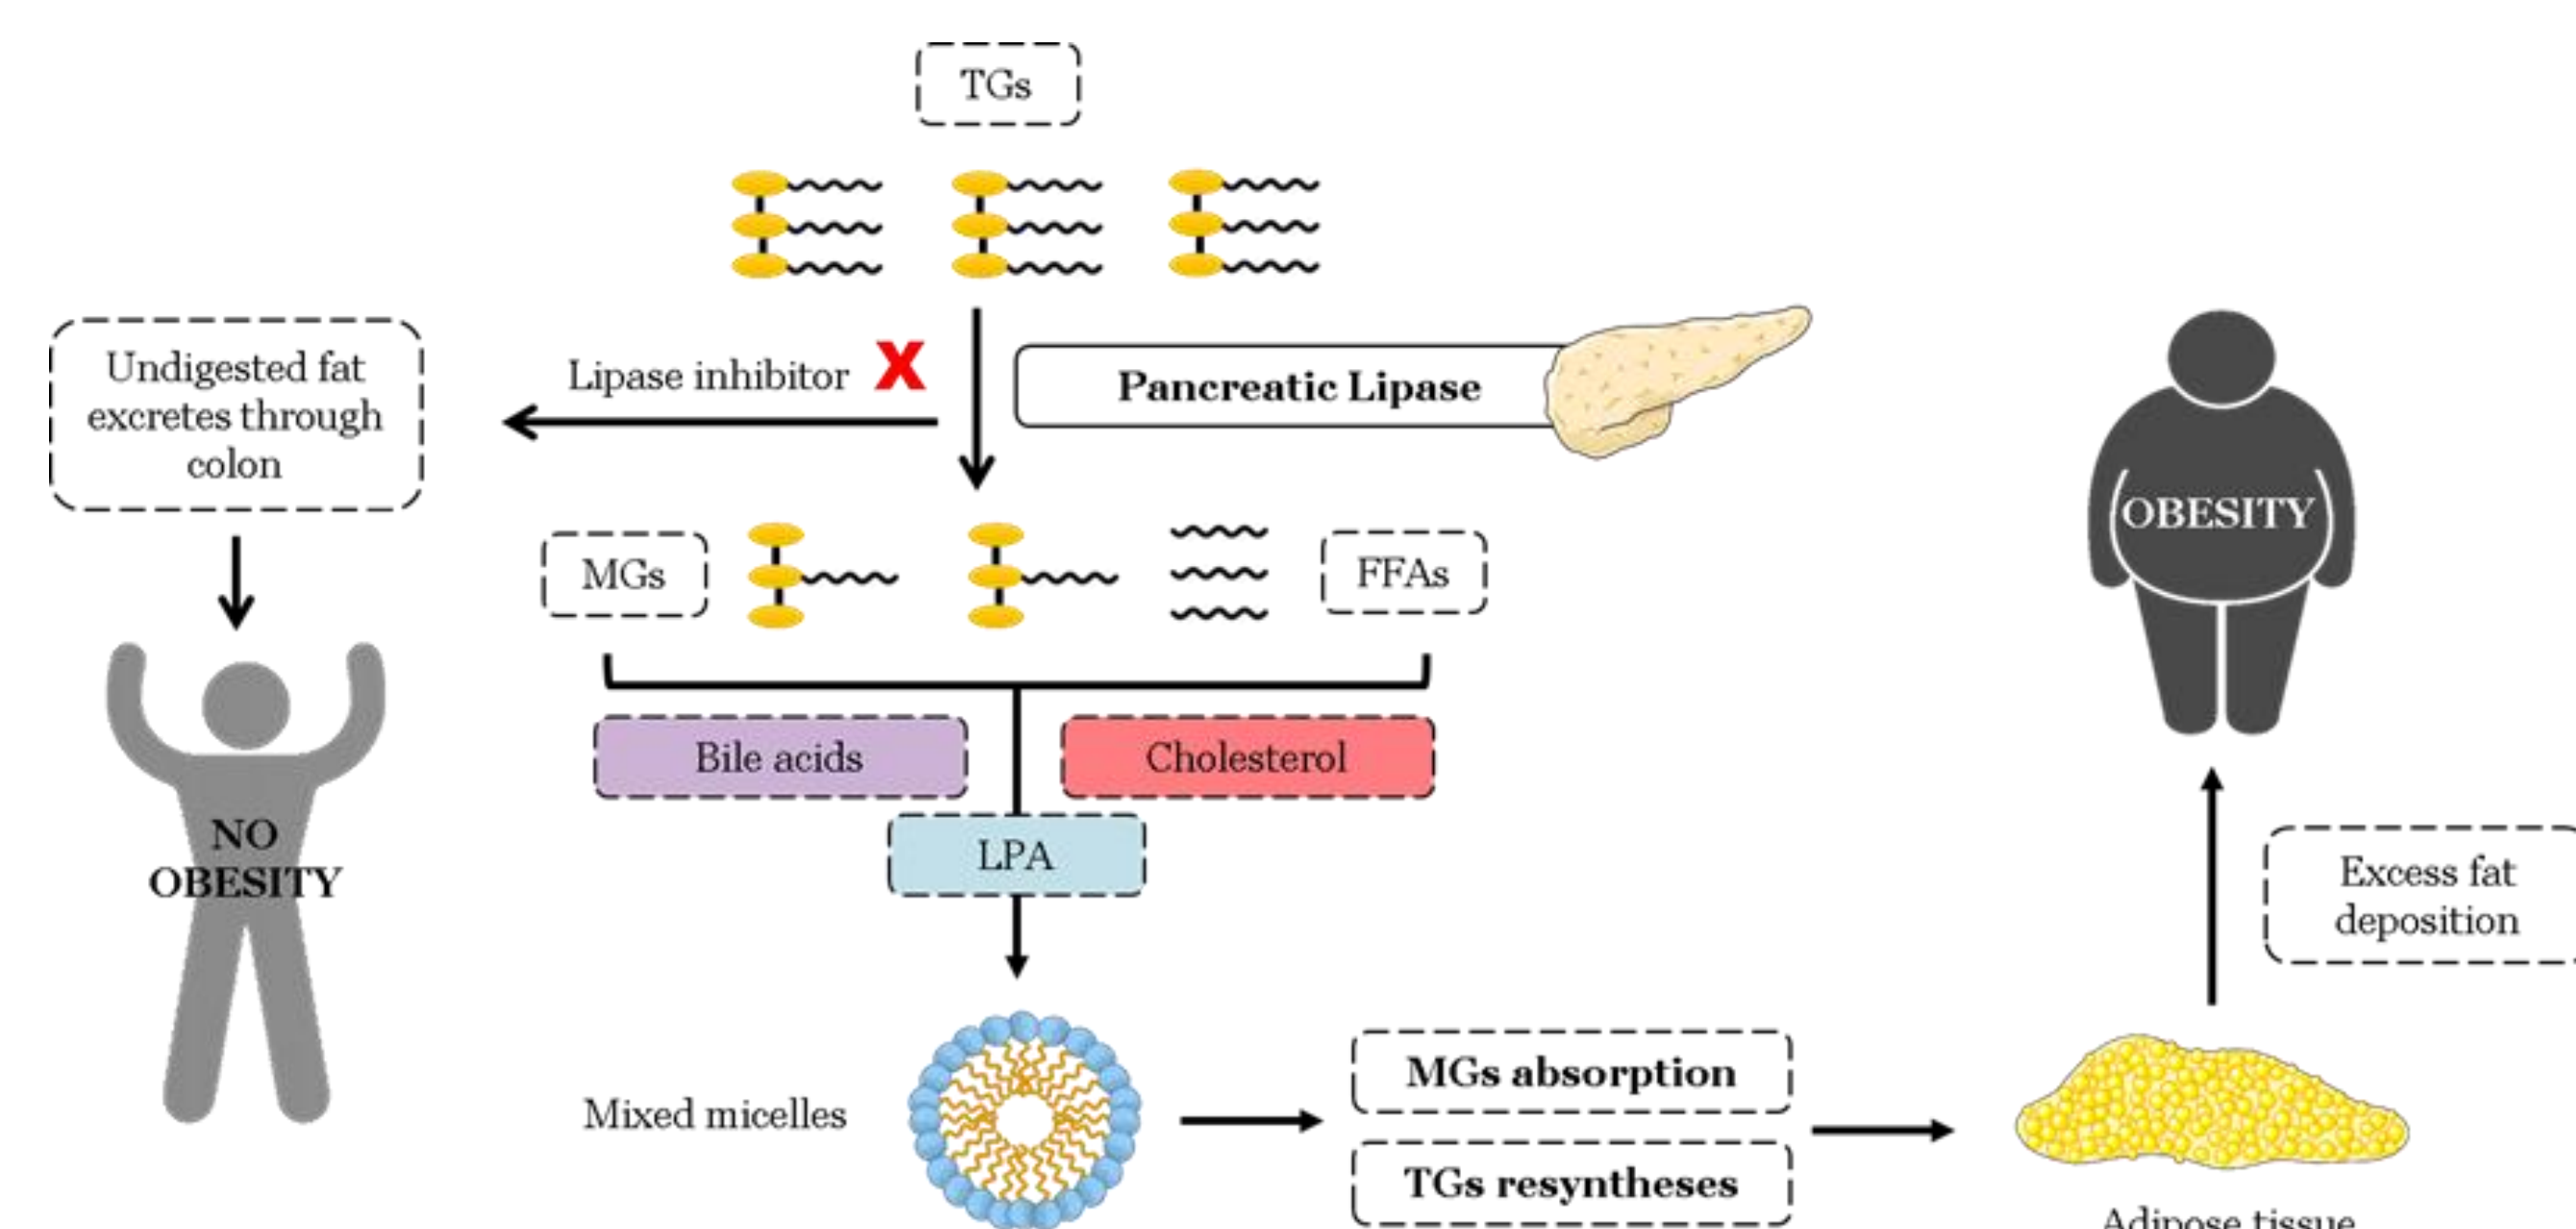

Figure 1. Lipids absorption and PL activity inhibition consequences.

## AIM

To evaluate the activity of seven chalcones with hydroxy (OH) and chloride (Cl) substituents (Table 1) as potential inhibitors of PL using spectrophotometric and fluorimetric microanalysis systems.

## METHODS

### SPECTROPHOTOMETRY UV/Vis

### FLUORIMETRY

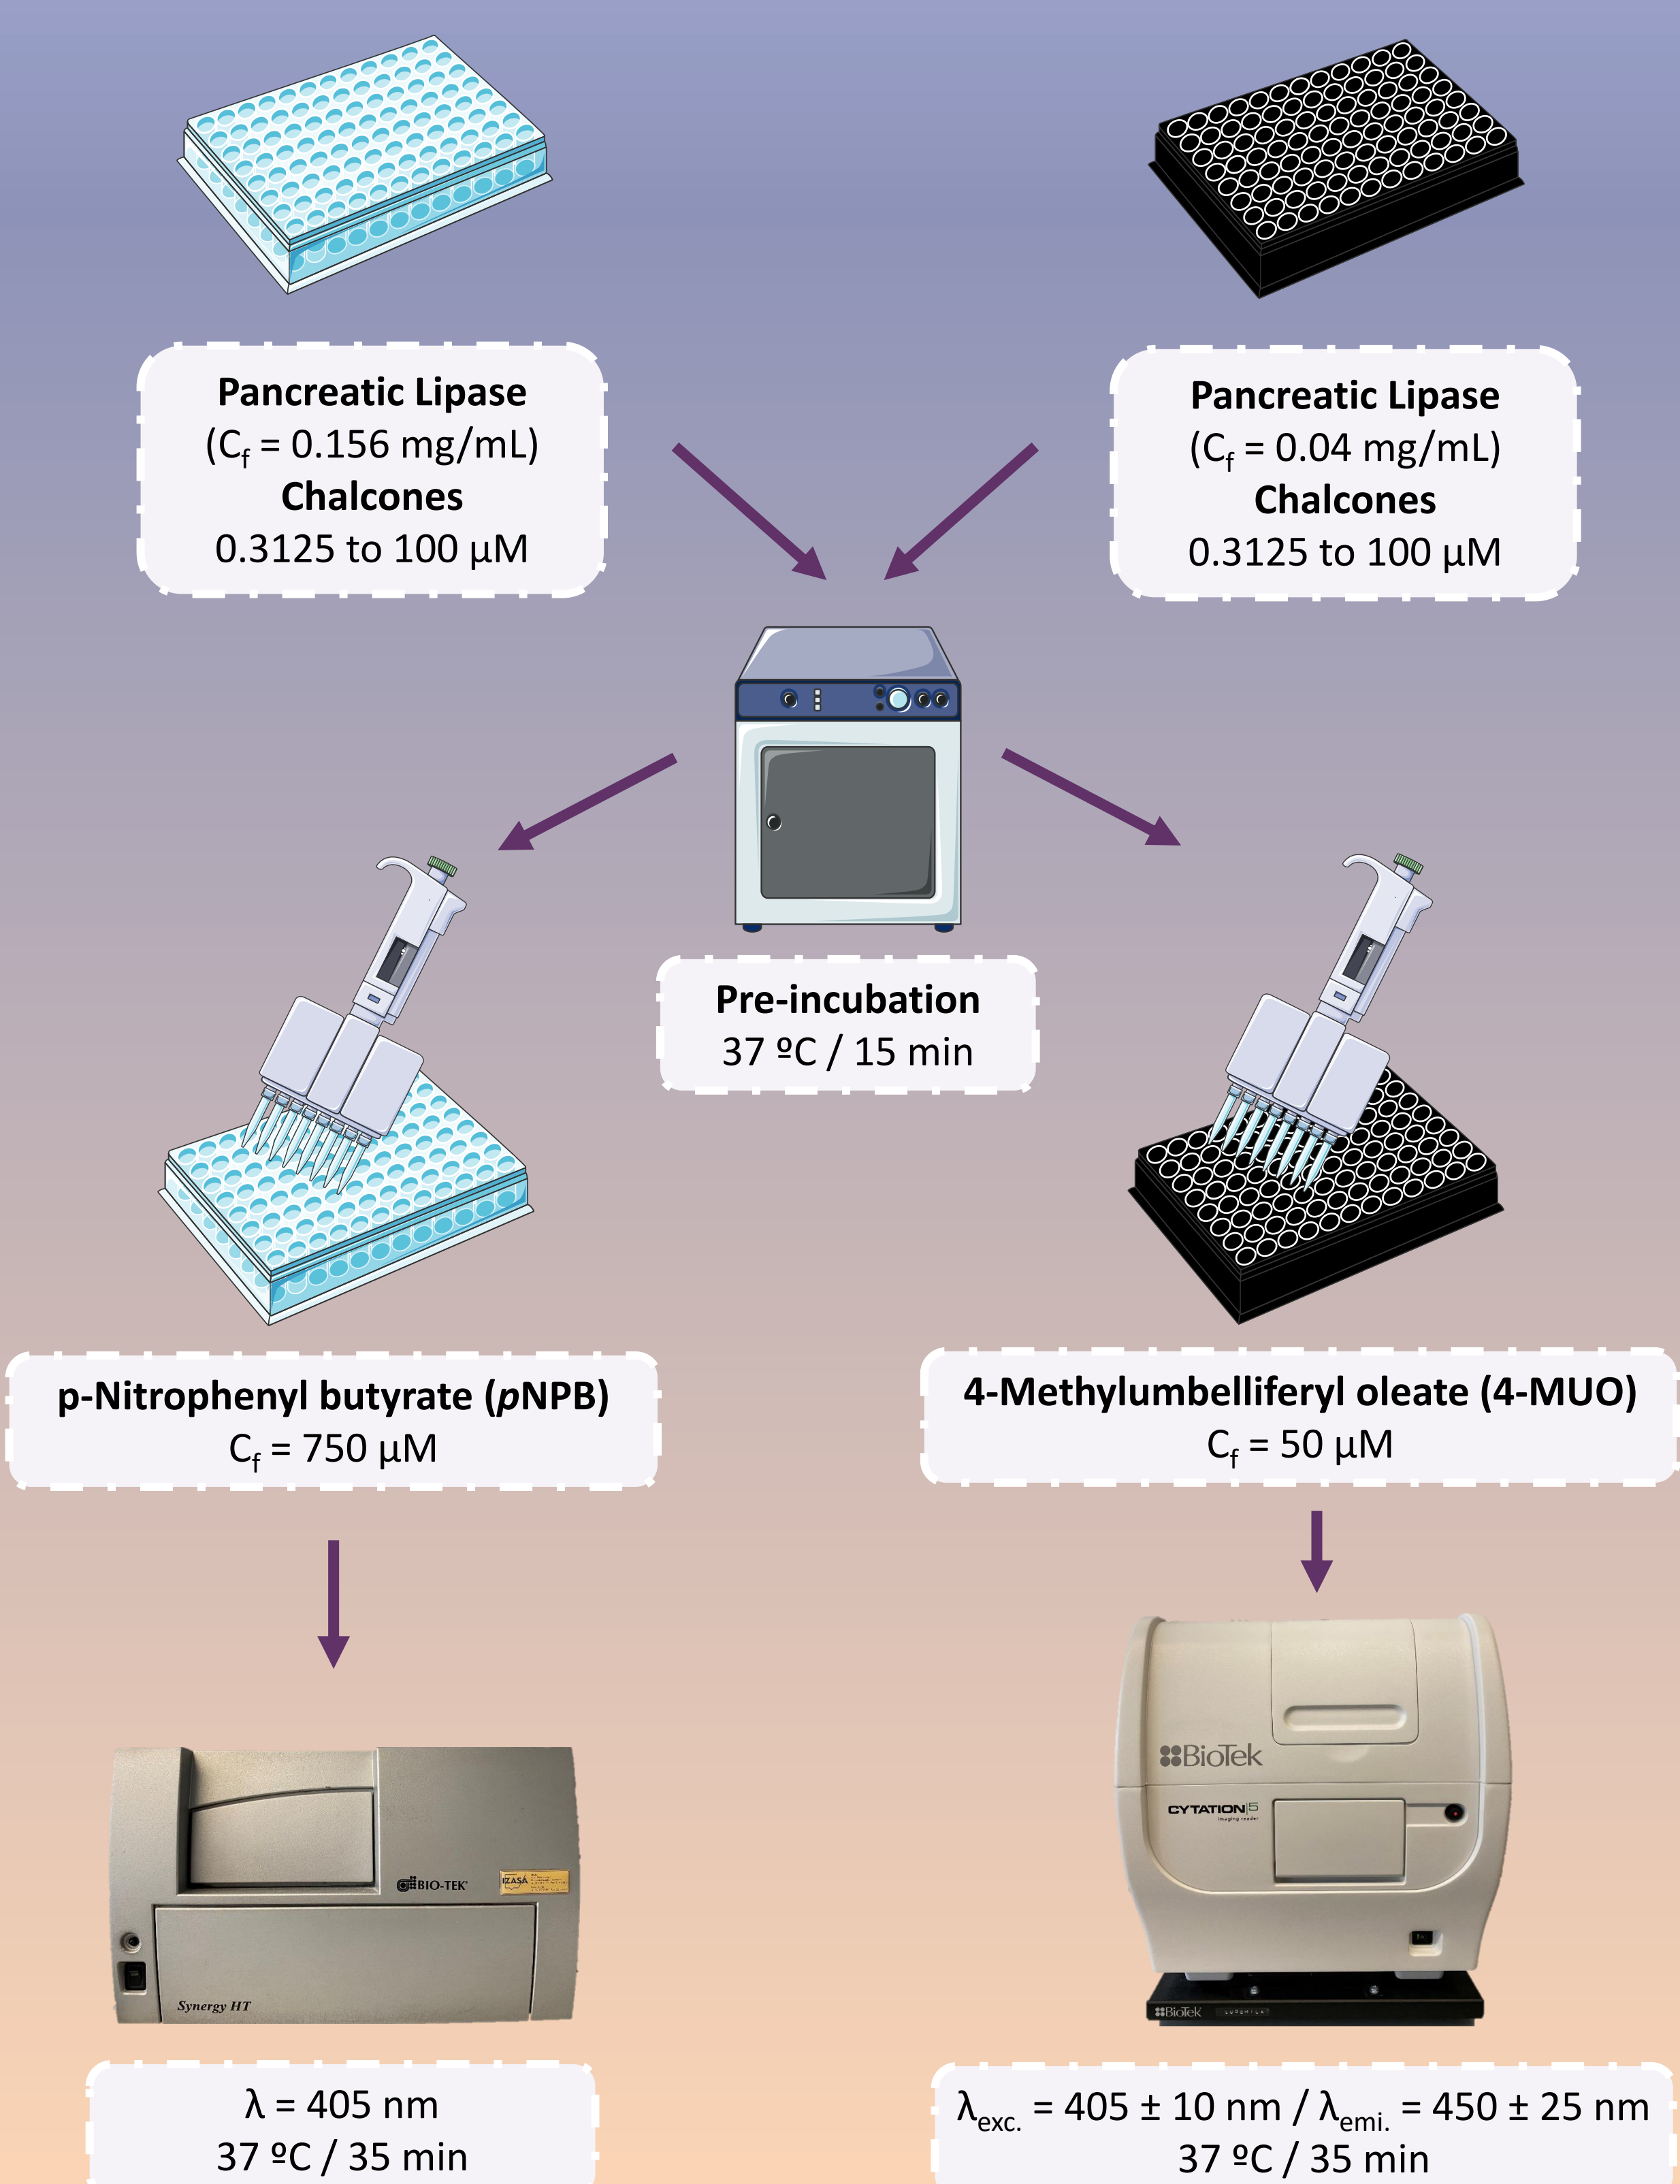

## RESULTS

|   |       |       |       |          |          |                                                 | <i>p</i> NPB | 4-MUO        |
|---|-------|-------|-------|----------|----------|-------------------------------------------------|--------------|--------------|
|   | $R_3$ | $R_4$ | $R_5$ | $R_{2'}$ | $R_{4'}$ | $IC_{50}$ ( $\mu$ M)<br>or<br>PL inhibition (%) |              |              |
| 1 | -     | -     | -     | -        | -        | < 30% 100 $\mu$ M                               | 45 $\pm$ 7 % | 50 $\mu$ M   |
| 2 | -     | -     | -     | OH       | -        | < 30% 100 $\mu$ M                               | 60 $\pm$ 6   |              |
| 3 | OH    | OH    | -     | -        | -        | 34 $\pm$ 5 % 100 $\mu$ M                        | < 30%        | 25 $\mu$ M   |
| 4 | OH    | OH    | -     | OH       | OH       | < 30% 100 $\mu$ M                               | < 30%        | 6.25 $\mu$ M |
| 5 | OH    | OH    | OH    | OH       | -        | < 30% 50 $\mu$ M                                | < 30%        | 12.5 $\mu$ M |
| 6 | -     | Cl    | -     | -        | -        | < 30% 100 $\mu$ M                               | < 30%        | 50 $\mu$ M   |
| 7 | Cl    | -     | -     | OH       | -        | 90 $\pm$ 5                                      | 35 $\pm$ 2 % | 25 $\mu$ M   |

Table 1. Inhibitory activity of the tested compounds against pancreatic lipase ( $IC_{50}$ ,  $\mu$ M  $\pm$  SEM, or % inhibition at the maximum concentration tested).

## CONCLUSIONS

The obtained results PL inhibitory activity of chalcones are concentration-dependent manner.

Considering the spectrophotometry and fluorimetry methodologies used, our results proved that:

- ✓ both instrumental techniques are effective for the evaluation of PL catalytic activity and the inhibitory effects of isolated compounds;
- ✓ the fluorimetric assay was shown to be more sensitive than the spectrophotometric UV/Vis assay.

From the results obtained in the fluorimetric assay, the compound that demonstrated the highest inhibitory activity was compound 2, that has an OH group at position 2' of ring A, with an  $IC_{50}$  = 60  $\pm$  6  $\mu$ M. It also appears that the OH groups in both rings A and B decrease the inhibitory capacity of chalcone to inhibit PL. The same conclusions cannot be taken with Cl substituents since we did not test enough compounds to make conclusions.

It was also observed that chalcones with OH groups have high interferences with fluorimetry, requiring further refinement of the performed assay.

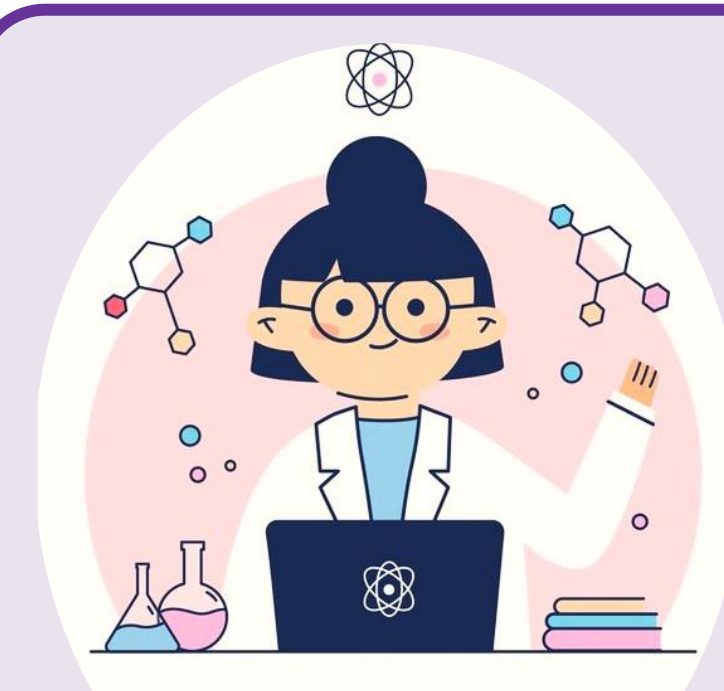

These findings bring new insights into the structure design for the modulation of PL and, although some compounds show some potential for PL inhibition, further studies are still needed to further explore these compounds as potential anti-obesity molecules!

## REFERENCES:

- <sup>1</sup> World Obesity Federation, "World Obesity Atlas 2022", 2022.
- <sup>2</sup> R. Birari, K. Bhutani, Drug Discov, 2007; 12(19-20): 879-889.
- <sup>3</sup> A. Li, et al., Nutrients, 2014; 6(12): 6020-6047.
- <sup>4</sup> K. Niaz, F. Khan, "Analysis of poyphenols", Elsevier, 2022, 39-197.

## ACKNOWLEDGMENTS:

This work received financial support from PT national funds (FCT/MCTES, Fundação para a Ciência e Tecnologia and Ministério da Ciência, Tecnologia e Ensino Superior) through the project UIDB/50006/2020 and UIDP/50006/2020, and from the National Funds (FCT) through project EXPL/MED-QUI/0815/2021, entitled "Screening and pharmacological characterization of flavonoids as lead compounds for obesity treatment". Sílvia Rocha thanks FCT and ESF (European Social Fund) through NORTE 2020 (Programa Operacional Regional do Norte) for her PhD grant ref. 2021.07176.BD. Ana T Rufino thank to FCT for the funding through the project PTDC/MED-QUI/29243/2017. Marisa Freitas acknowledges her contract under the CEEC Individual (2020.04126.CEECIND/CP1596/CT0006) and also LAQV-REQUIMTE for her contract under the reference LA/P/0008/2020.

ECMC  
2022

The 8th International Electronic  
Conference on Medicinal Chemistry  
01-30 NOVEMBER 2022 | ONLINE
